# Supplementary material
Source: PubMed Central journal article supplement (PMC3811556)
Supplement: AEM.02028-13_zam999104850so1.pdf [file AEM.02028-13_zam999104850so1.pdf]

|    |                                                                            |
|----|----------------------------------------------------------------------------|
| 1  | <b>Supplementary Information</b>                                           |
| 2  |                                                                            |
| 3  | <b>Transcriptional Response of the Archaeal Ammonia Oxidizer</b>           |
| 4  | <b><i>Nitrosopumilus maritimus</i> to Low and Environmentally Relevant</b> |
| 5  | <b>Ammonia Concentrations</b>                                              |
| 6  |                                                                            |
| 7  | Tatsunori Nakagawa, David A. Stahl                                         |
| 8  |                                                                            |
| 9  |                                                                            |
| 10 |                                                                            |

## 11 **Supplementary Materials and Methods**

12

13 **Medium.** The basal salt medium contained NaCl 26 g, MgSO<sub>4</sub>·7H<sub>2</sub>O 5 g,  
14 MgCl<sub>2</sub>·6H<sub>2</sub>O 5 g, CaCl<sub>2</sub>·2H<sub>2</sub>O 1.5 g, KBr 0.1 g in 1000 ml of ultra pure water. The  
15 following solutions were autoclaved separately and added to 1 liter of autoclaved basal  
16 salt medium at room temperature; 10 ml of 1 M HEPES in 0.6 M NaOH, 2 ml of 1 M  
17 sodium bicarbonate, 5 ml of 2.93 mM KH<sub>2</sub>PO<sub>4</sub>, 1 ml of 7.5 mM FeNa-EDTA, 1 ml of  
18 non-chelated trace element mixture (0.5 mM H<sub>3</sub>BO<sub>3</sub>, 0.5 mM MnCl<sub>2</sub>·4H<sub>2</sub>O, 0.8 mM  
19 CoCl<sub>2</sub>·6H<sub>2</sub>O, 0.1 mM NiCl<sub>2</sub>·6H<sub>2</sub>O, 0.01 mM CuCl<sub>2</sub>·2H<sub>2</sub>O, 0.5 mM ZnSO<sub>4</sub>·7H<sub>2</sub>O, 0.15  
20 mM Na<sub>2</sub>MoO<sub>4</sub>·2H<sub>2</sub>O dissolved in 100 mM HCl), and 1 ml of 1 M NH<sub>4</sub>Cl. The pH of  
21 the medium after adding the above stock solutions was 7.5.

22

23 **qPCR.** The DNA was extracted from the cells fixed with RNALater solution using  
24 DNeasy Blood & Tissue Kit (QIAGEN). The *amoA* genes of *N. maritimus* SCM1 in  
25 medium were quantified by real-time PCR in a LightCycler system with LightCycler  
26 FastStart DNA Master SYBR Green I kit (Roche Diagnostics). The primer set,  
27 CrenAmo-SCM1-F and CrenAmoAModR (Table S1), was used for the quantitative  
28 PCR. Ten-fold dilution series of genomic DNA of *N. maritimus* SCM1 was used for  
29 DNA standard for the quantitative PCR. The cycling condition was as follows: an  
30 initial denaturation at 95°C for 5 min; 35 cycles at 95°C for 10 s, 55°C for 10 s and  
31 72°C for 13 s, followed by a melting curve analysis. The fluorescence intensity was  
32 measured at 77°C. The amplification efficiency of quantitative PCR averaged 87.2%  
33 ( $r^2 = 0.999$ ).

34

35 **RNA standards for qRT-PCR.** To generate RNA standards for qRT-PCR, DNA  
36 fragments for each RNA standard were amplified with the following PCR primer sets:  
37 CrenAmo-SCM1-F and CrenAmoA-ModR (1) for the *amoA* gene, amt1F-490 and  
38 amt1R-644 for the *amt1* gene and amt2F-956 and amt2R-811 for the *amt2*,  
39 hcd-911F-SCM1 and hcd-1267R-SCM1 for the *hcd* gene, Slayer2614F and  
40 Slayer2821R for the *slp1* gene, and SL2-2908F and SL2-3030R for the *slp2* gene (Table  
41 S1). PCR amplified DNA fragments were cloned into pCRII-TOPO (Life  
42 Technologies) with TOPO TA Cloning Dual Promoter Kit (Life Technologies).  
43 Plasmids were extracted with PureLink Quick Plasmid Miniprep Kit (Life  
44 Technologies) and RNA amplified from purified plasmids using T7 RNA Polymerase  
45 (Life Technologies). The RNA was extracted with a general acidic phenol method and  
46 treated twice with DNase (Life Technologies). The length and quality of each RNA  
47 standards was confirmed with a Bioanalyzer 2100 (Agilent Technologies, Santa Clara,  
48 CA), and quantified with a NanoDrop 1000 spectrophotometer (Thermo Fisher  
49 Scientific, Waltham, MA).

50

## 51 **REFERENCE**

- 52 1. **Mincer TJ, Church MJ, Trent Taylor L, Preston C, Karl DM, DeLong EF.**  
53 2007. Quantitative distribution of presumptive archaeal and bacterial nitrifiers in  
54 Monterey Bay and the North Pacific Subtropical Gyre. *Environ. Microbiol.*  
55 **9:1162-1175.**

56

57

58 **Table S1** PCR primers used in this study.

| primer                      | target gene                | sequence (5' - 3')    |
|-----------------------------|----------------------------|-----------------------|
| CrenAmo-SCM1-F              | <i>amoA</i> of SCM1 strain | CCAAGTAGGTAAGTTCTATAA |
| CrenAmoA-ModR               | <i>amoA</i> of SCM1 strain | AAGCGGCCATCCATCTGTA   |
| amt1F-490                   | <i>amt1</i> of SCM1 strain | GGTGGTATTGTAATTCACAC  |
| amt1R-644                   | <i>amt1</i> of SCM1 strain | AGCACTACCTGCGTTAAATC  |
| amt2F-956                   | <i>amt2</i> of SCM1 strain | GTAGTACACATTTCTTCAGG  |
| amt2R-811                   | <i>amt2</i> of SCM1 strain | TTCACTACCTGCGTTAAAGC  |
| hcd-911F-SCM1 <sup>a</sup>  | <i>hcd</i> of SCM1 strain  | AGCTATGTTTGCAAAACAGG  |
| hcd-1267R-SCM1              | <i>hcd</i> of SCM1 strain  | CTCATTCTGTTTTCCACATC  |
| hcd-1153F-SCM1 <sup>b</sup> | <i>hcd</i> of SCM1 strain  | TTAGCTCAAGATATTGCAGG  |
| Slayer2614F                 | <i>slp1</i> of SCM1 strain | GTTGTTGGTTCAGCAACTAC  |
| Slayer2821R                 | <i>slp1</i> of SCM1 strain | GATCTACACCAATCAACTGG  |
| SL2-2908F                   | <i>slp2</i> of SCM1 strain | ACACCATATACCTACGCAGG  |
| SL2-3030R                   | <i>slp2</i> of SCM1 strain | TCTAACACCTGCTGAGTCGC  |

<sup>a</sup> Primer hcd-911F-SCM1 was used only to amplify *hcd* gene fragment during the making of RNA standard.

<sup>b</sup> Primer hcd-1153F-SCM1 was used only for qRT-PCR analyses.

59

60

61 **Table S2** PCR cycles for qRT-PCR.

| PCR cycle                                                                                                                                                                                                        | target RNA of SCM1            |
|------------------------------------------------------------------------------------------------------------------------------------------------------------------------------------------------------------------|-------------------------------|
| 61°C for 20 min, 95°C for 30 sec, 35 cycles of 95°C for 5 sec, 56°C for 10 sec, and 72°C for 13 sec, and a detection at 77°C for 3 sec, followed by a melting curve (65 to 95°C) with heating rate of 0.1°C/sec. | <i>amoA, amt1, amt2, slp1</i> |
| 61°C for 20 min, 95°C for 30 sec, 35 cycles of 95°C for 5 sec, 56°C for 10 sec, and 72°C for 13 sec, and a detection at 75°C for 3 sec, followed by a melting curve (65 to 95°C) with heating rate of 0.1°C/sec. | <i>hcd</i>                    |
| 61°C for 20 min, 95°C for 30 sec, 35 cycles of 95°C for 5 sec, 56°C for 10 sec, and 72°C for 13 sec, and a detection at 79°C for 3 sec, followed by a melting curve (65 to 95°C) with heating rate of 0.1°C/sec. | <i>slp2</i>                   |

62

63

64

65 **Fig. S1** Overview of experiment and sampling time points for batch culture, dialysis  
66 bag systems, and  $\text{NH}_4^+$ -starvation experiments.

67

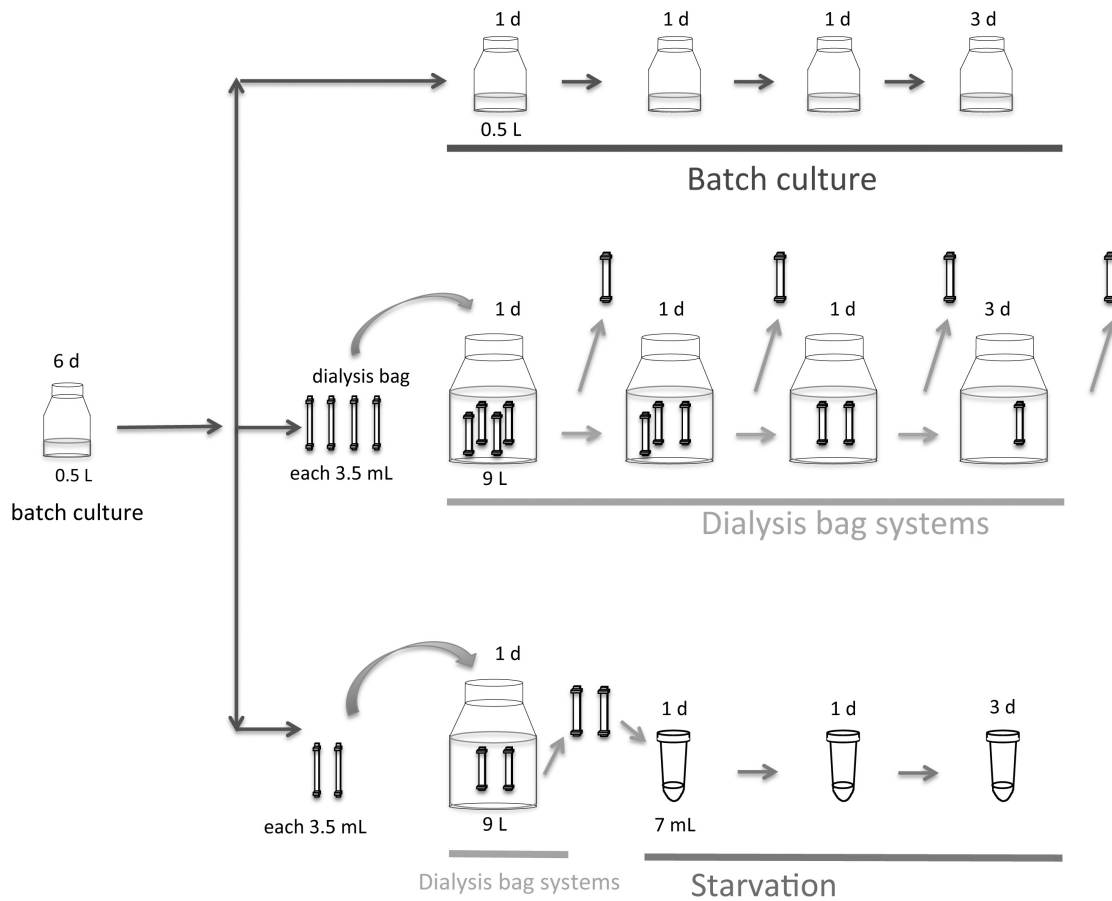

68

69

70 **Fig. S2** Overview of experiment and sampling time points for short-term ammonia  
71 starvation and readdition studies.

72

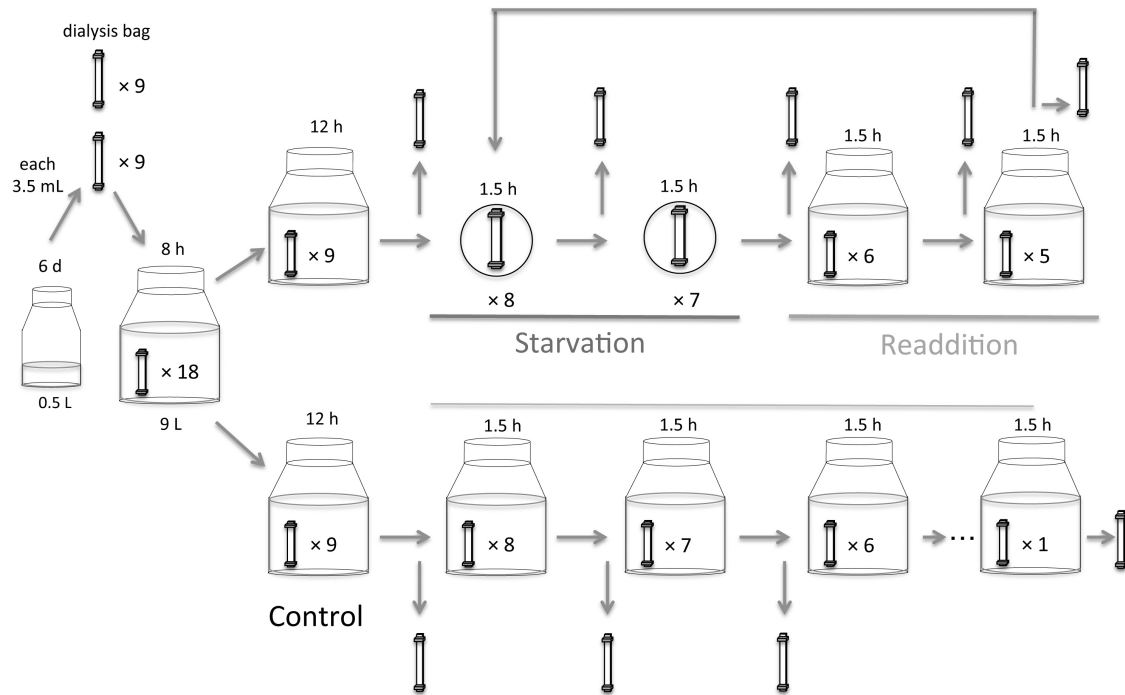

73

74

75

76 **Fig. S3** Changes in concentrations of (A)  $\text{NH}_4^+$  and (B)  $\text{NO}_2^-$  in media of *N.*  
 77 *maritimus* SCM1 during short-term starvation and readdition experiments (open squares,  
 78 inner dialysis bag; closed squares, outer dialysis bag), and continuous dialysis bag  
 79 growth (open circles, inner dialysis bag; closed circles, outer dialysis bag). These  
 80 concentrations were determined with each dialysis bag described in Fig. 3.  
 81

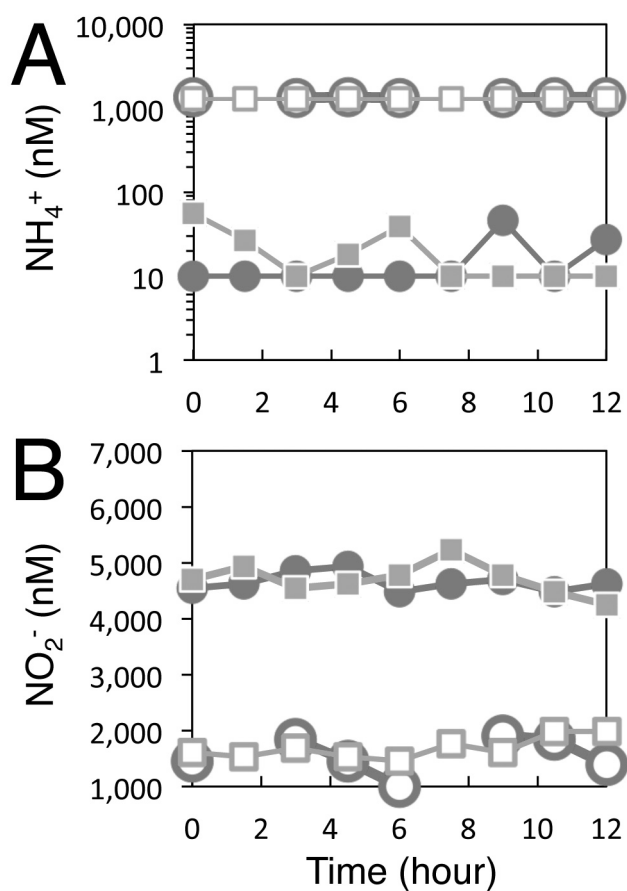

82  
 83  
 84  
 85
